# Supplementary material for: Serum Levels of IFABP2 and Differences in Lactobacillus and Porphyromonas gingivalis Abundance on Gut Microbiota Are Associated with Poor Therapeutic Response in Rheumatoid Arthritis: A Pilot Study
Source: MDPI journal article supplement (doi:10.3390/ijms24031958), 2023-01-19
Supplement: s1 [file s1]

A)

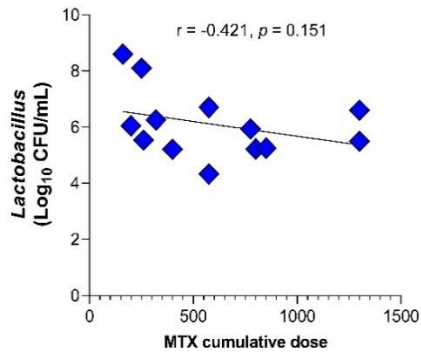

B)

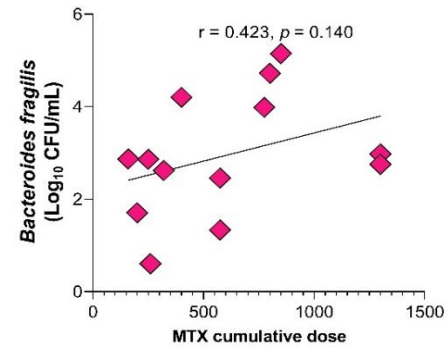

C)

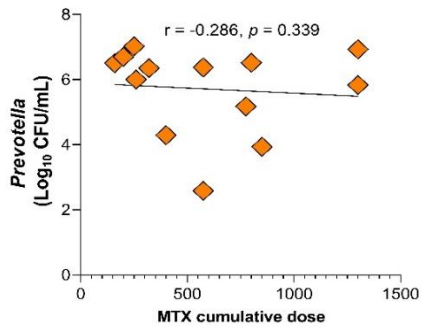

D)

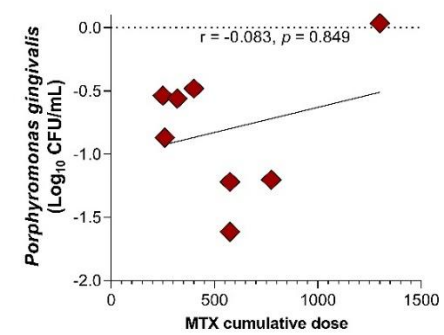

E)

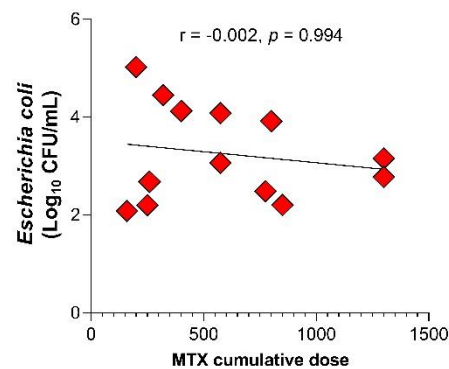

Figure S1. Correlation between MTX cumulative doses with the gut microbiota in RA patients with treatment. (A) *Lactobacillus*, (B) *Bacteroides fragilis*, (C) *Prevotella*, (D) *Porphyromonas gingivalis*, and (E) *Escherichia coli*. Spearman's correlation.  $r$ =rho, correlation coefficient.  $p$ -Value <0.05 was considered statistically significant.

A)

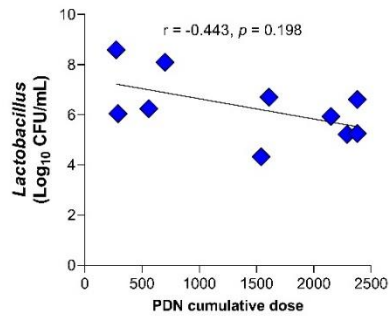

B)

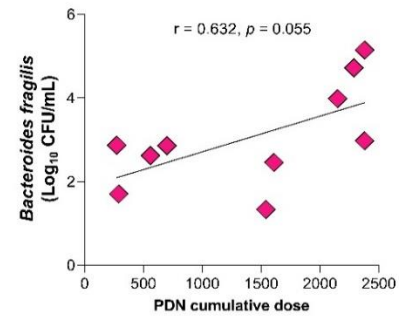

C)

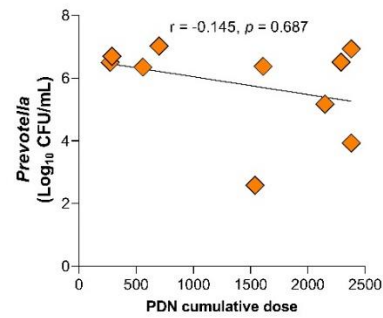

D)

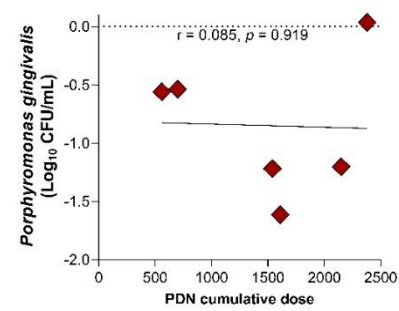

E)

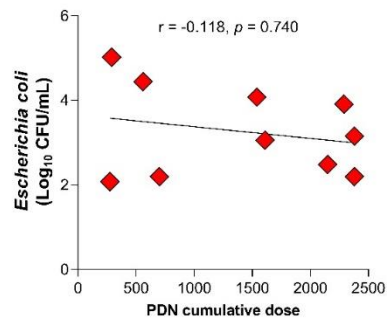

Figure S2. Correlation between PDN cumulative doses with the gut microbiota in RA patients with treatment. (A) *Lactobacillus*, (B) *Bacteroides fragilis*, (C) *Prevotella*, (D) *Porphyromonas gingivalis*, and (E) *Escherichia coli*. Spearman's correlation.  $r = \rho$ , correlation coefficient.  $p$ -Value  $< 0.05$  was considered statistically significant.

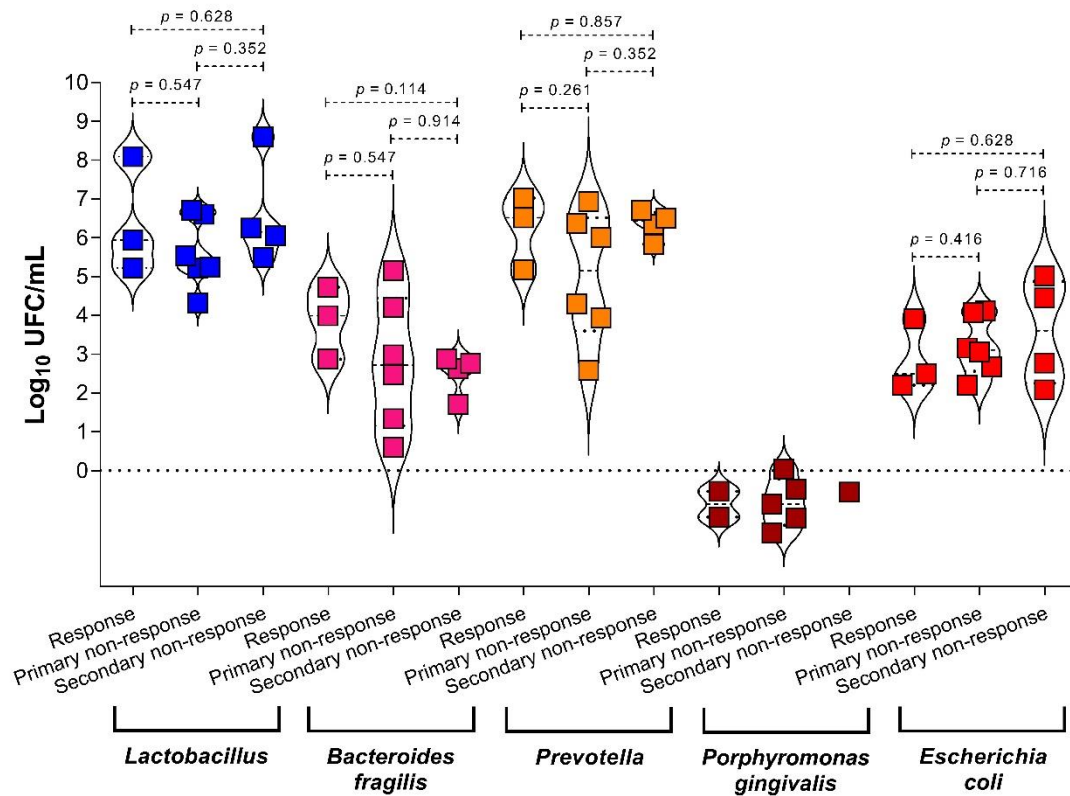

Figure S3. Association of gut microbiota according to response to phenotype to therapy in RA patients. Statistical analyses were performed by Mann Whitney U test.  $p$ -Value  $<0.05$  was considered statistically significant.

**Table S1.** Sequences of primers of bacterial specific for qPCR.

| Bacterial group                 | Primer    | Sequence               | Product size (pb) | Cycles and amplification conditions                                      | Reference |
|---------------------------------|-----------|------------------------|-------------------|--------------------------------------------------------------------------|-----------|
| Firmicutes                      |           |                        |                   |                                                                          |           |
| <i>Lactobacillus</i>            | F         | CGATGAGTGCTAGGTGTTGGA  | 186               | 40 cycles                                                                | [63]      |
|                                 | R         | CAAGATGTCAAGACCTGGTAAG |                   | 5 min at 94°C, 20 s at 94°C, 20 s at 55°C, 50 s at 72°C, 30 s at 94°C    |           |
| Bacteroidetes                   |           |                        |                   |                                                                          |           |
| <i>Bacteroides fragilis</i>     | g-Bfra-F  | ATAGCCTTTCGAAAGRAAGAT  | 495               | 40 cycles                                                                | [64,65]   |
|                                 | g-Bfra-R  | CCAGTATCAACTGCAATTTTA  |                   | 5 min at 94°C, 20 s at 94°C, 20 s at 50°C, 30 s at 72°C, 1 min at 72°C   |           |
| <i>Prevotella</i>               | g-Prevo-F | CACRGTAACGATGGATGCC    | 513               | 40 cycles                                                                | [64,65]   |
|                                 | g-Prevo-R | GGTCGGGTTGCAGACC       |                   | 5 min at 94°C, 20 s at 94°C, 20 s at 58.7°C, 50 s at 72°C, 1 min at 72°C |           |
| <i>Porphyromonas gingivalis</i> | F         | AGGCAGCTTGCCATACTGCG   | 404               | 40 cycles                                                                | [66]      |
|                                 | R         | ACTGTTAGCAACTACCGATGT  |                   | 2 min at 94°C, 20 s at 94°C, 20 s at 60°C, 20 s at 72°C, 1 min at 72°C   |           |
| Proteobacteria                  |           |                        |                   |                                                                          |           |
| <i>Escherichia coli</i>         | F         | CATGCCGCGTGTATGAAGAA   | 95                | 40 cycles                                                                | [67]      |
|                                 | R         | CGGGTAACGTCAATGAGCAAA  |                   | 5 min at 94°C, 20 s at 94°C, 20 s at 60°C, 50 s at 72°C, 1 min at 72°C   |           |

qPCR, quantitative polymerase chain reaction.
